# Supplementary material for: Exploring novel bismuth-based materials for energy storage applications
Source: Royal Society of Chemistry journal article supplement (doi:10.1039/c8tc02801j), 2018-01-01
Supplement: c8tc02801j1.pdf [file c8tc02801j1.pdf]

## Supplementary Data

### Exploring novel bismuth-based material for energy storage applications

Feng Li<sup>a,b,c</sup>, Tao Jiang<sup>a</sup>, Jiwei Zhai<sup>a\*</sup>, Bo Shen<sup>a</sup>, Huarong Zeng<sup>b\*</sup>

a. Key Laboratory of Advanced Civil Engineering Materials of Ministry of Education, Functional Materials Research Laboratory, School of Materials Science & Engineering, Tongji University, 4800 Caoan road, Shanghai 201804, China

b. Key Laboratory of Inorganic Functional Materials and Devices, Shanghai Institute of Ceramics, Chinese Academy of Sciences, Shanghai 200050, China

c. University of Chinese Academy of Sciences, Beijing 100049, People's Republic of China

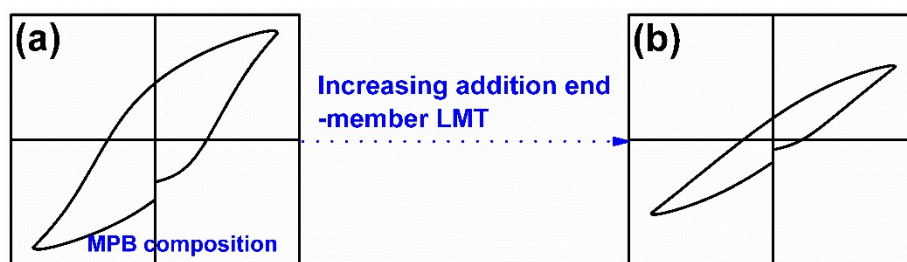

**Figure S1** The evolution of P-E loops (a) MPB composition with tetragonal-pseudocubic phase and (b) ergodic phase composition with pseudo-cubic phase for BKT-LMT systems. Both the ceramics exhibits poor energy storage properties by CS.

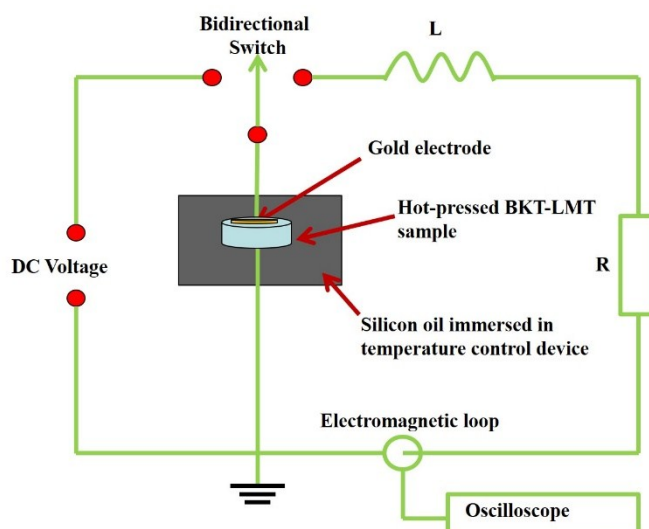

**Figure S2** Schematic diagram of the charge-discharge device.
